# Supplementary material for: The NRON complex controls circadian clock function through regulated PER and CRY nuclear translocation
Source: PubMed Central journal article supplement (PMC6695496; doi:10.1038/s41598-019-48341-8), 2019-08-15
Supplement: 41598_2019_48341_MOESM1_ESM.pdf [file 41598_2019_48341_MOESM1_ESM.pdf]

## Supporting information for:

# The NRON complex controls circadian clock function through regulated PER and CRY nuclear translocation

Yool Lee<sup>1,2</sup>, Yang Shen<sup>3,4</sup>, Lauren J. Francey<sup>1,5</sup>, Chidambaram Ramanathan<sup>4</sup>, Amita Sehgal<sup>2</sup>, Andrew C. Liu<sup>3,4</sup>,  
John B. Hogenesch<sup>1,5\*</sup>

<sup>1</sup> Department of Systems Pharmacology and Translational Therapeutics, University of Pennsylvania Perelman School of Medicine, Philadelphia, PA 19104

<sup>2</sup> Penn Chronobiology, Howard Hughes Medical Institute, Dept of Neuroscience, Perelman School of Medicine, University of Pennsylvania, Philadelphia, PA. 19104

<sup>3</sup> Department of Physiology and Functional Genomics, University of Florida College of Medicine, Gainesville, FL 32610

<sup>4</sup> Department of Biological Sciences, University of Memphis, Memphis, TN 38152

<sup>5</sup> Divisions of Human Genetics and Immunobiology, Cincinnati Children's Hospital Medical Center, Cincinnati, OH 45229

\*Correspondence to: John Hogenesch ([john.hogenesch@cchmc.org](mailto:john.hogenesch@cchmc.org))

# Figure S1

## A ATP-lite cell death assay 96 h post transfection

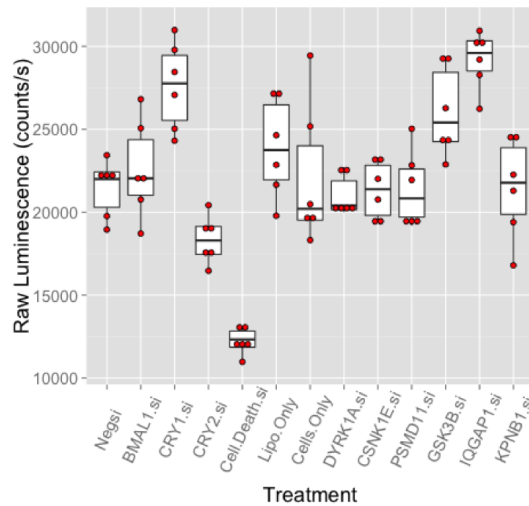

## B shRNA knockdown of the NRON complex components in MMH-D3 cells expressing the *Per2-dLuc* reporter

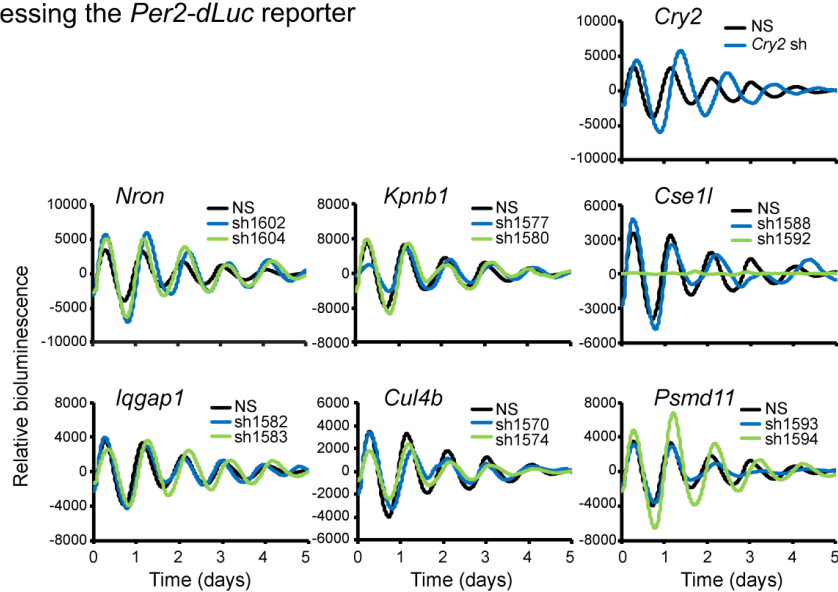

## C Inhibition of DYRK1A with Harmine causes dose-dependent period lengthening effect in U2OS cells expressing the *Per2-dLuc* reporter

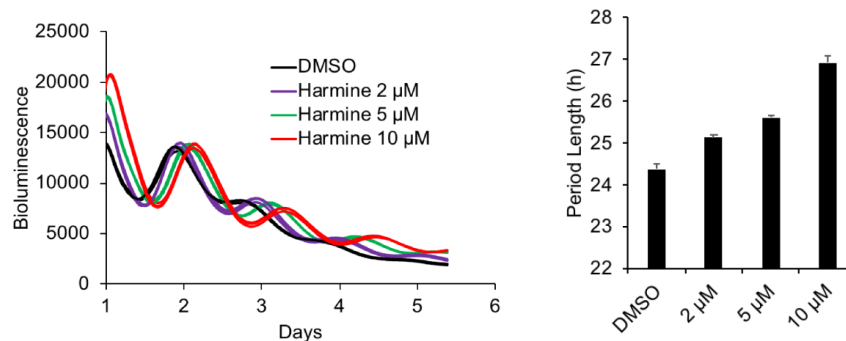

**Figure S1.** Effects of RNAi knockdown of the NRON complex components on circadian oscillations in cellular clock models. **(A)** Cytotoxicity of selected siRNA pools using the ATP-lite cell viability assay 96 h post-

transfection (n= 6 replicates per treatment). The Cell Death siRNA (Cell.Death.si) pool had ~50% cell viability compared to the negative siRNA control (Negsi) at this time point. **(B)** shRNA knockdown effects of the NRON complex components in MMH-D3 hepatocyte cells expressing the *Per2-dLuc* reporter. *Nron*, *Kpnb1*, *Cse1l*, *Iqgap1*, *Cul4b* and *Psmc11* are the NRON complex components. NS (non-specific), negative control. *Cry2*, positive control. **(C)** Pharmacological inhibition of DRYK1A lengthens period length in U2OS cells expressing the *Per2-dLuc* reporter. Representative bioluminescence records (left) and quantified period length (right) are shown for DMSO and different dosages of Harmine.

# Figure S2

## For Figure 2A

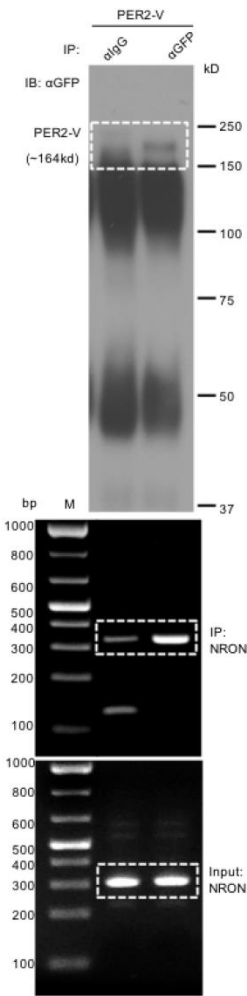

## For Figure 2B

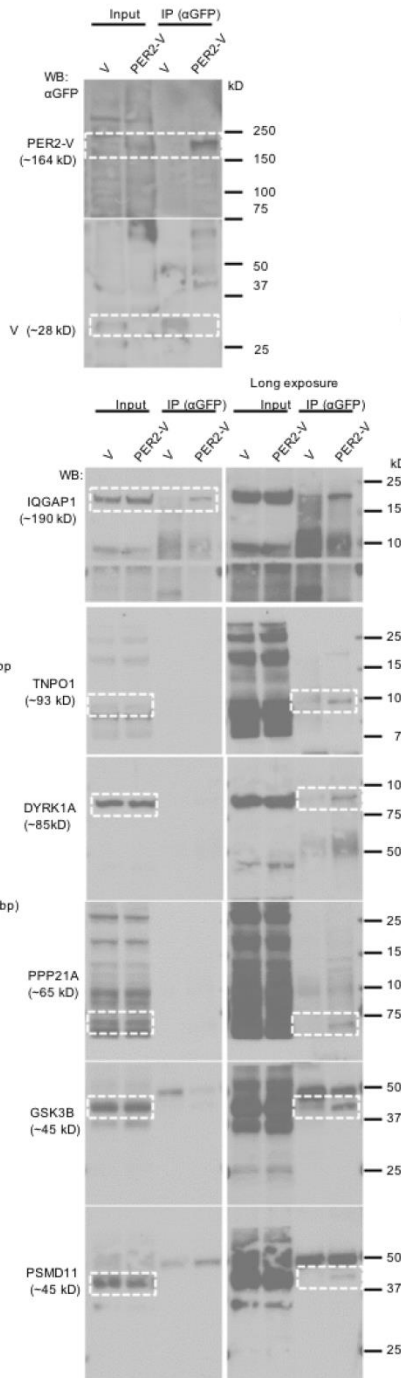

## For Figure 2D

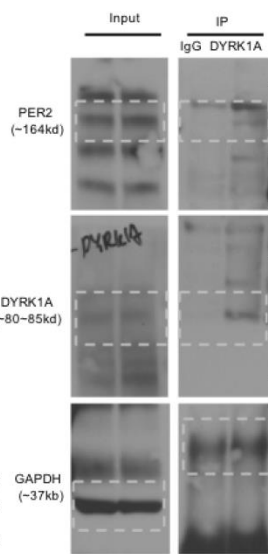

## For Figure 2E

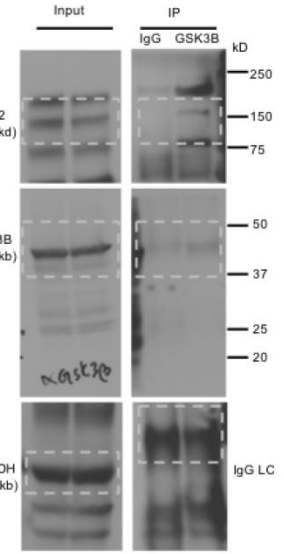

## For Figure 3C

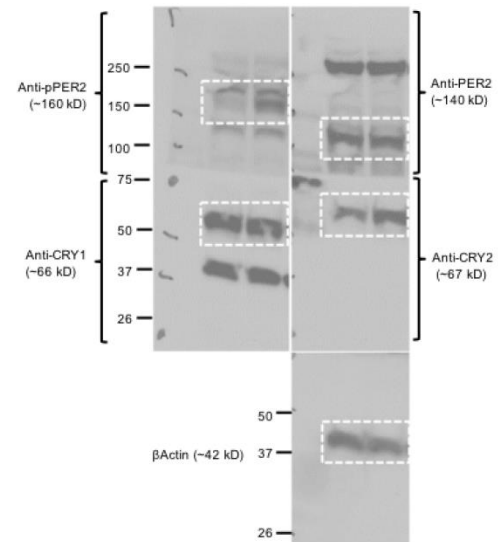

**Figure S2.** Original blot data for Figure 2 and Figure 3C. The clipped blot images are indicated with white dashed rectangles.

# Figure S3

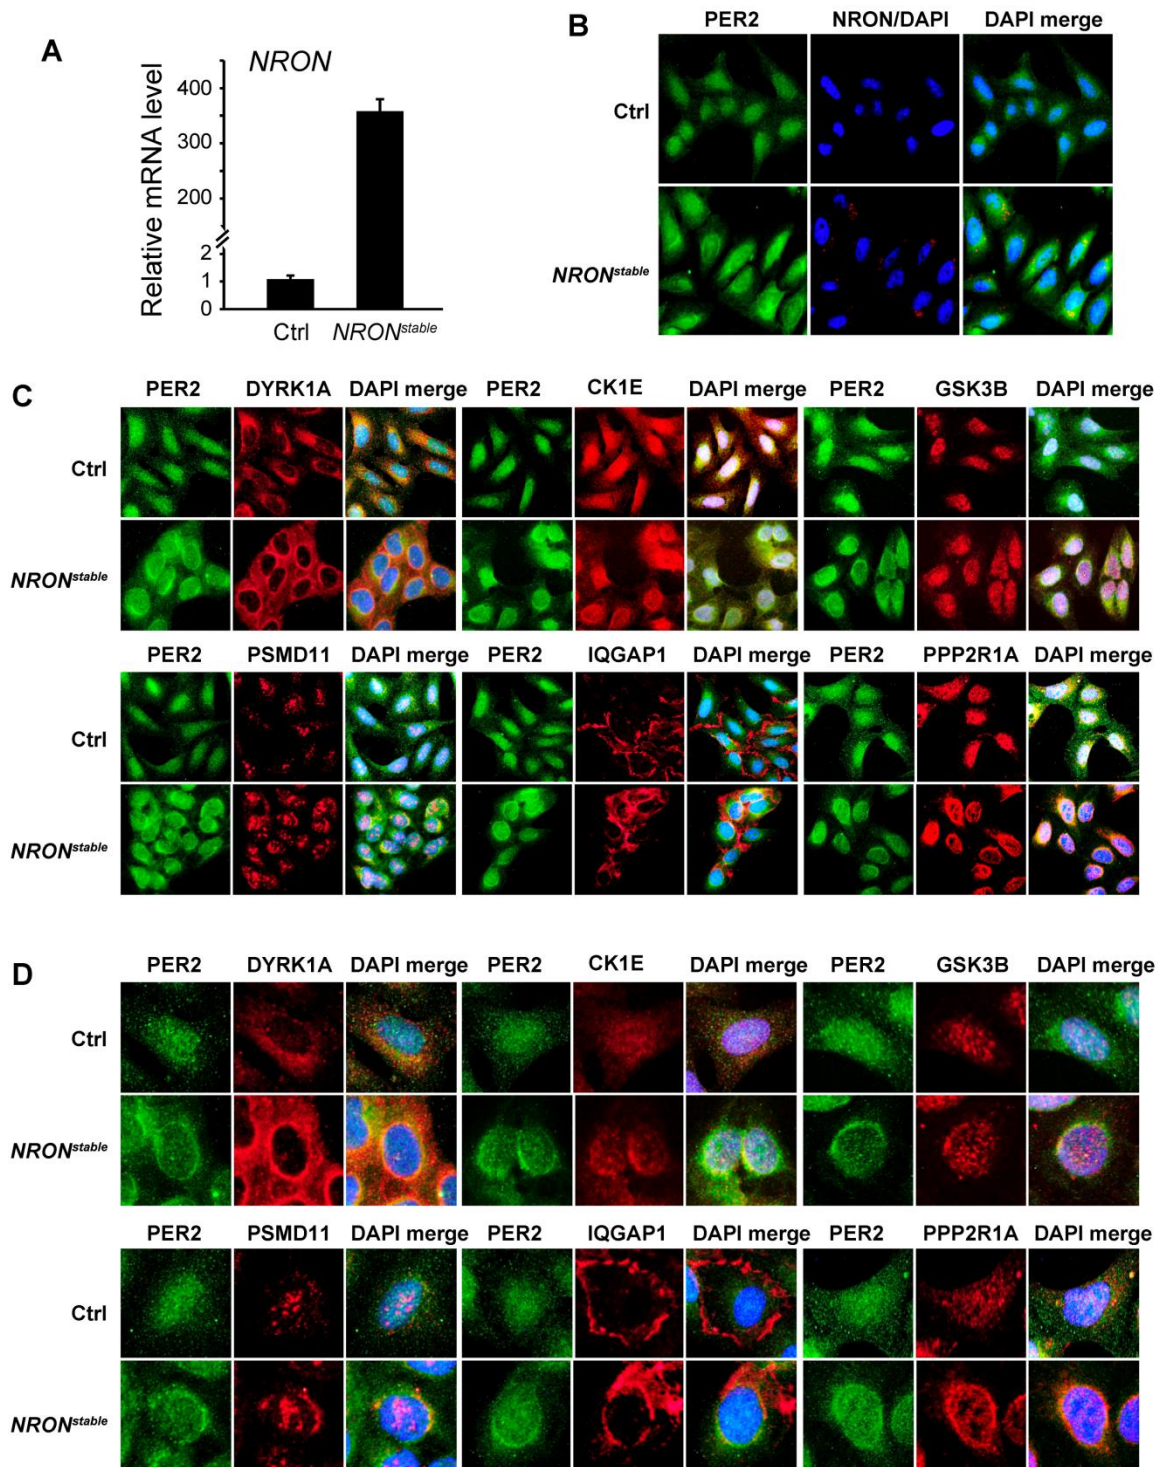

**Figure S3.** PER2 colocalizes with NRON complex components at the perinuclear region. **(A)** Quantitative RT-PCR analysis of NRON expression in control U2OS cells (Ctrl) and cells stably overexpressing *NRON* (*NRON<sup>stable</sup>*). Data are mean  $\pm$  SE of triplicate samples. **(B)** Combined RNA fluorescence in situ hybridization (RNA FISH) and immunofluorescence analysis of subcellular localization of *NRON* and PER2. Fluorescence microscopy filter sets: FITC (green, PER), TRITC (red, *NRON*), and DAPI (blue, nucleus). **(C)** Immunofluorescence analysis of subcellular localization of PER2 and NRON complex components.

Fluorescence microscopy filter sets: FITC (green, PER2), TRITC (red, NRON complex components as indicated), and DAPI (blue; nucleus). **(D)** Representative single cell images from (C).

## Figure S4

- A** siRNA knockdown of the catalytic subunits of calcineurin (*PPP3CA*, *CB* and *CC*) in human U2OS cells expressing the *Per2-dLuc* reporter

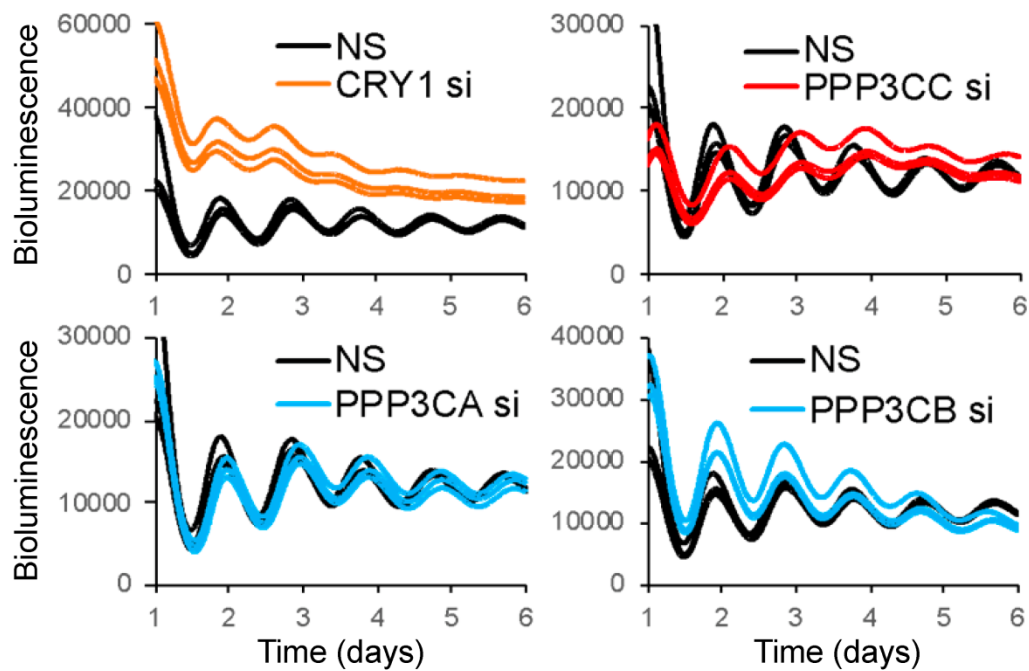

- B** shRNA knockdown of the catalytic subunit of calcineurin (*Ppp3cc*) in mouse MMH-D3 cells expressing the *Per2-dLuc* reporter

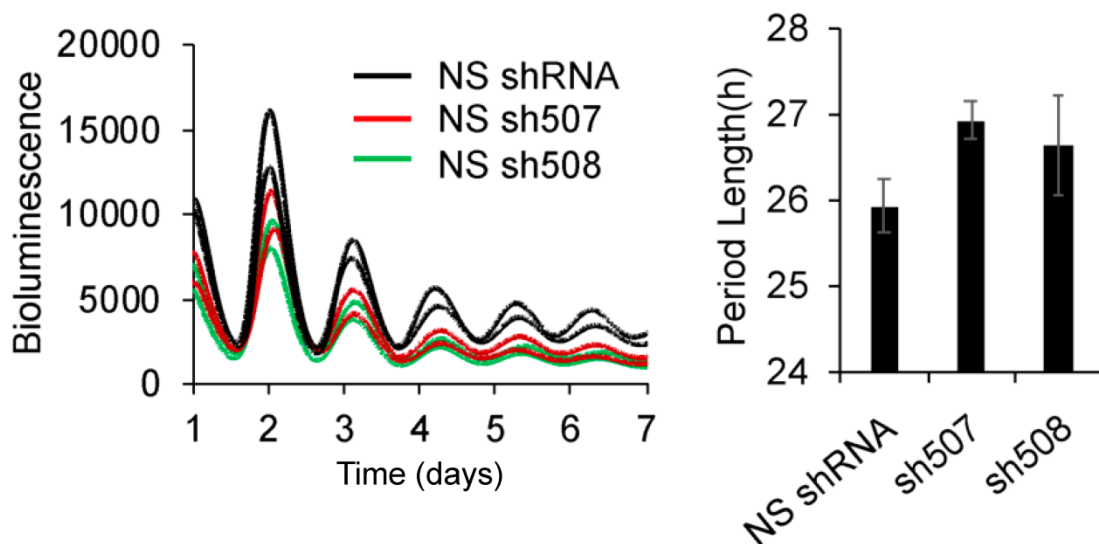

**Figure S4.** Effects of knockdown of the catalytic subunit (*PPP3CC*) of calcineurin (CaN) on period length. **(A)** siRNA knockdown of the catalytic subunits of CaN (*PPP3CA*, *PPP3CB* and *PPP3CC*) in human U2OS cell expressing the *Per2-dLuc* reporter. NS, non-specific. *CRY1* serves as a positive control. **(B)** Lentiviral shRNA knockdown of *Ppp3cc* caused long period length in mouse MMH-D3 cells expressing the *Per2-dLuc* reporter.

Two independent shRNA constructs against *Ppp3cc* were used. NS, non-specific. Representative bioluminescence records (left) and quantified period length data (right) are shown.



**Figure S5**

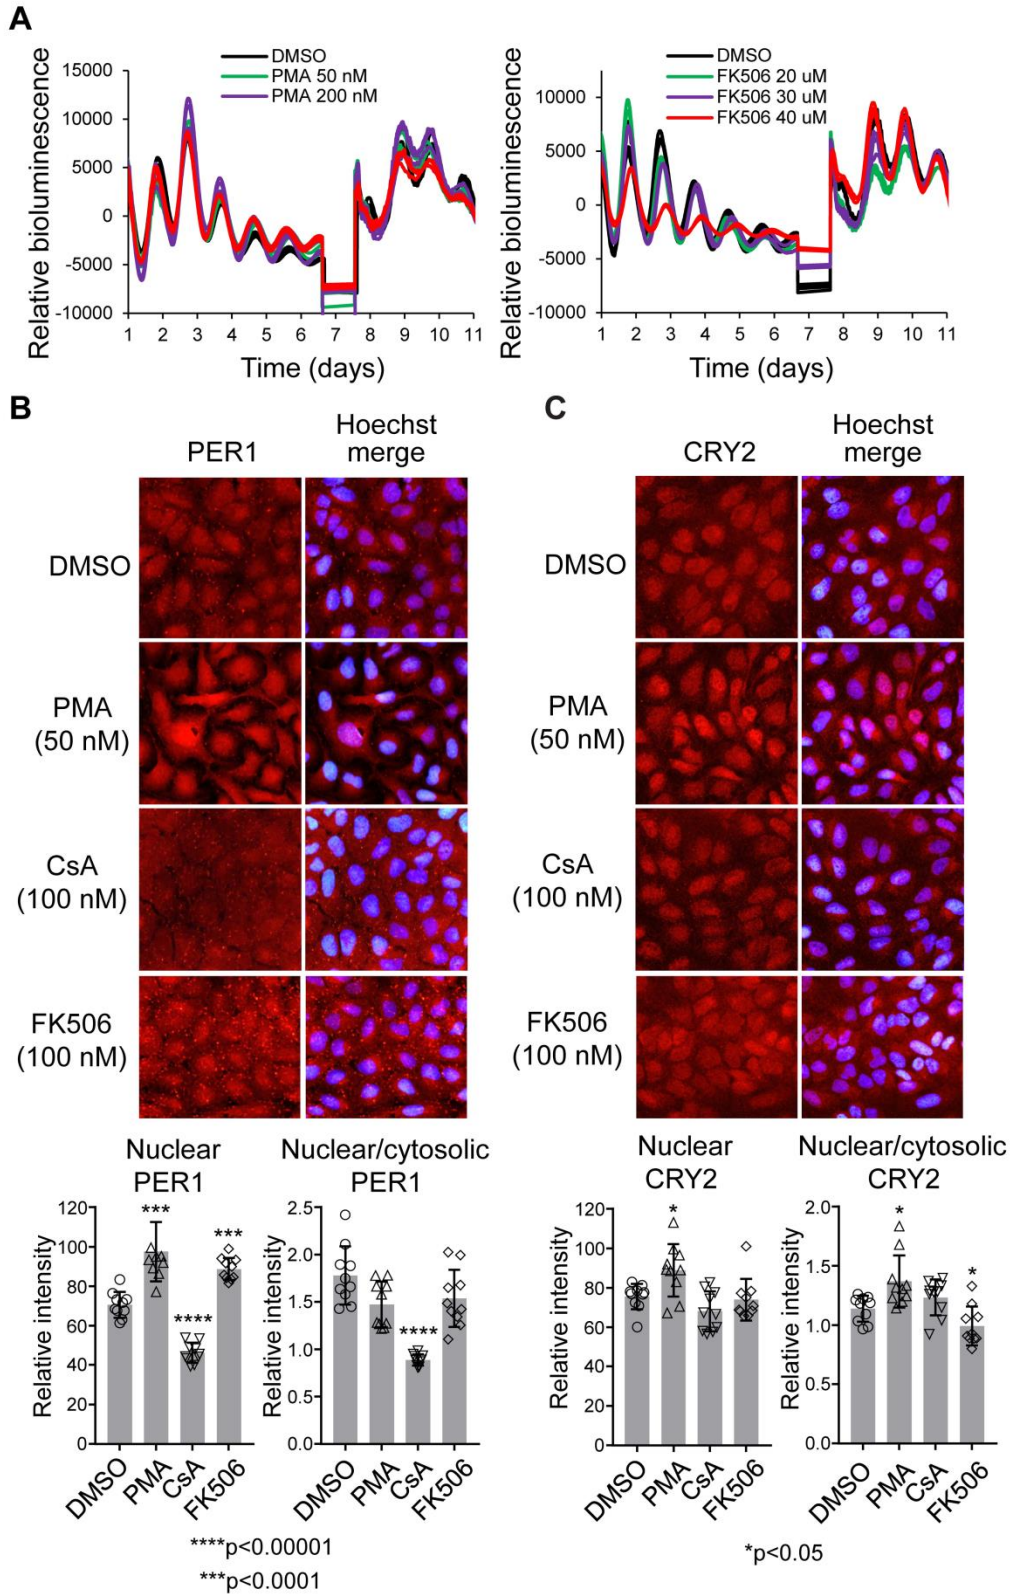

**Figure S5.** Effects of pharmacological perturbation of the NRON/NFAT pathway on circadian rhythms and nuclear localization of PER1 and CRY2 in U2 OS cells. PMA, activator. CsA and FK506, inhibitors. **(A)** Representative bioluminescence records of circadian rhythms in U2OS cells expressing the *Bmal1-Luc*

reporter upon PMA (left) or FK506 (right) treatment. Cellular toxicity was not shown in varying doses of PMA (50~200 nM) and FK506 (20~40  $\mu$ M) as bioluminescence rhythms of the the drug-treated cells were reactivated as robustly as DMSO-treated controls when resynchronized. **(B-C)** PER1 and CRY2 proteins were detected by immunostaining using anti-PER1 and anti-CRY2 antibodies. Representative images (upper) are shown with quantitative assessment of nuclear/cytoplasmic ratio (lower) for the effect on PER1 and CRY2 nuclear abundance after 6 h of treatment. Data are presented as mean  $\pm$  SD (n = 10); \*p<0.05, \*\*\*p<0.00001 by two-tailed student's t-test.
